# Supplementary material
Source: publisher figshare collection journal article supplement (https://acs.figshare.com/ndownloader/files/4106812)

**Supporting Information**  
**for**  
**Generation of the Volatile Spiroketal Conophthorin and Chalcogran by**  
**Fungal Spores on Polyunsaturated Fatty Acids Common to Almonds and**  
**Pistachios**

John J. Beck,<sup>\*,†</sup> Noreen E. Mahoney,<sup>†</sup> Daniel Cook,<sup>‡</sup> and Wai S. Gee <sup>†</sup>

<sup>†</sup> Plant Mycotoxin Research, Western Regional Research Center, Agricultural Research Service,  
U. S. Department of Agriculture, 800 Buchanan Street, Albany, California 94710, United States;

<sup>‡</sup> Poisonous Plant Research Laboratory, Agricultural Research Service, U.S. Department of  
Agriculture, 1150 East 1400 North, Logan, Utah 84341, United States

Table of Contents

|          |                                          |
|----------|------------------------------------------|
| Page ii  | Summary of all volatiles detected        |
| Page iii | Detailed pairwise day-to-day comparisons |
| Page iv  | Picture of volatile collection chamber   |

**Table S1.** Tentative and verified compounds detected from control experiments with just fatty acids or experiments with individual fungal spores on individual fatty acids. Compounds with no authentication retention time should be considered tentative. Volatile difference between treatments is not delineated.

| Volatiles detected                    | RT (DB-Wax) | Auth. RT |
|---------------------------------------|-------------|----------|
| $\alpha$ -Pinene                      | 3.36        |          |
| 1-Propananol                          | 3.38        | 3.28     |
| 2-Hexanone                            | 3.78        | 3.76     |
| Hexanal                               | 3.79        | 3.78     |
| 3-Pentanol                            | 3.92        | 3.92     |
| 2-Pentanol                            | 4.04        | 4.03     |
| 2-Butyl furan                         | 4.26        | 4.24     |
| Butanol                               | 4.32        |          |
| 1,2-Epoxyheptane                      | 4.44        |          |
| 1-Penten-3-ol                         | 4.48        | 4.47     |
| 3-Methyl-4-heptanone                  | 4.50        |          |
| 2-Heptanone                           | 4.86        | 4.86     |
| Cyclopentanone                        | 4.99        | 4.99     |
| Limonene                              | 5.16        |          |
| 2-Hexanol                             | 5.27        | 5.27     |
| Butyl butyrate                        | 5.32        |          |
| Hexyl formate                         | 5.37        | 5.22     |
| 2-Pentyl furan                        | 5.52        | 5.52     |
| Pentanol                              | 5.75        | 5.75     |
| 1-Acetylcyclohexene                   | 5.80        |          |
| 3-Octanone                            | 5.90        | 5.91     |
| Styrene                               | 5.97        |          |
| 2-Penten-1-ol acetate                 | 6.18        |          |
| 2-Octanone                            | 6.40        | 6.40     |
| Conophthorin (CONO)                   | 6.54        | 6.54     |
| 2-Heptanol                            | 6.92        | 6.93     |
| 2-Penten-1-ol, (Z)-                   | 6.94        | 6.94     |
| 2-Heptenal, (E)-                      | 7.12        | 7.12     |
| 6-Octen-2-one                         | 7.22        |          |
| 4-Ethylcyclohexanone                  | 7.51        |          |
| Hexanol                               | 7.58        | 7.57     |
| Chalcogran, (E)- (CHALC 1)            | 7.69        | 7.69     |
| Chalcogran, (Z)- (CHALC 2)            | 7.77        | 7.78     |
| 3-Hexen-1-ol, (Z)-                    | 8.20        | 8.20     |
| 2-Nonanone                            | 8.33        | 8.32     |
| 3-Octanol                             | 8.36        | 8.37     |
| Nonanal                               | 8.40        |          |
| 1-Ethyl-1-methylcyclopentane          | 8.61        |          |
| 2-Octanol                             | 8.90        | 8.89     |
| 2-Octenal, (E)-                       | 9.18        | 9.17     |
| 1-Octen-3-ol                          | 9.53        | 9.52     |
| Heptanol                              | 9.68        | 9.68     |
| 5-Octen-2-ol                          | 9.78        | 9.82     |
| 2,4-Heptadienal, (E,E)-               | 9.88        |          |
| 2-Ethylhexanol                        | 10.40       |          |
| 2-Hepten-1-ol, (E)-                   | 10.88       |          |
| Pentyl hexanoate                      | 10.91       | 10.88    |
| 2-Hepten-1-ol, (Z)-                   | 10.98       |          |
| 6-Undecanone                          | 11.22       | 11.22    |
| Cyperene                              | 11.35       |          |
| 2-Butyltetrahydrofuran                | 11.41       |          |
| Cyclohexanol, 2,4-dimethyl-           | 11.49       |          |
| Butyric anhydride                     | 11.60       |          |
| Octanol                               | 11.75       | 11.75    |
| Calarene                              | 12.33       |          |
| 2-Octen-1-ol, (E)-                    | 12.49       | 12.49    |
| 2-Octen-1-ol, (Z)-                    | 12.52       |          |
| 5-Octen-1-ol, (Z)-                    | 12.53       | 12.53    |
| 6-Dodecanone                          | 12.68       |          |
| Hexanoic anhydride                    | 13.00       |          |
| 1,3-Cyclooctadiene / 1,3,6-Octatriene | 13.23       |          |
| 3-Nonen-1-ol, (Z)-                    | 13.23       | 13.23    |
| 2,4-Heptadien-1-ol                    | 13.26       |          |
| $\gamma$ -Hexalactone                 | 13.41       | 13.38    |
| 2,4-Decadienal, (E,Z)-                | 13.92       |          |
| Benzeneethanol, $\alpha$ -methyl-     | 14.39       |          |
| Hexanoic acid                         | 14.52       |          |
| 1-Nonen-4-ol / 1,2-Heptanediol        | 14.81       |          |
| 1-Nonen-4-ol / 1,2-Heptanediol        | 15.27       |          |
| Nonalactone                           | 15.80       | 15.73    |

**Table S2.** Two way ANOVA followed by pairwise comparison (Bonferroni t-test) of spore ages. Days compared are dependent upon amount of time between volatile analyses (Permeation time). Compared are days 6, 8, 13 (Permeation = 24 h); and, days 4 and 11 (Permeation = 72 h).

|                                  |                | Linoleic Acid |         |              |         |              |         | Linolenic    |         |              |         |
|----------------------------------|----------------|---------------|---------|--------------|---------|--------------|---------|--------------|---------|--------------|---------|
| Spore                            | Day Comparison | Conophthorin  |         | Chalcogran 1 |         | Chalcogran 2 |         | Chalcogran 1 |         | Chalcogran 2 |         |
|                                  |                | Sig. Diff.    | P =     | Sig. Diff.   | P =     | Sig. Diff.   | P =     | Sig. Diff.   | P =     | Sig. Diff.   | P =     |
| <i>A. flavus</i><br>(atoxigenic) | 11 to 4        | Yes           | < 0.001 | No           | 1       | No           | 1       | No           | 1       | No           | 1       |
|                                  | 13 to 8        | Yes           | < 0.001 | Yes          | < 0.001 | Yes          | < 0.001 | Yes          | < 0.001 | Yes          | < 0.001 |
|                                  | 13 to 6        | No            | 1       | Yes          | < 0.001 | Yes          | 0.003   | Yes          | < 0.001 | Yes          | < 0.001 |
|                                  | 8 to 6         | Yes           | 0.001   | No           | 0.148   | Yes          | 0.030   | No           | 1       | No           | 1       |
| <i>A. flavus</i><br>(toxigenic)  | 11 to 4        | Yes           | < 0.001 | No           | 0.169   | No           | 0.060   | No           | 1       | No           | 0.572   |
|                                  | 13 to 8        | No            | 1       | No           | 1       | No           | 1       | No           | 1       | No           | 1       |
|                                  | 13 to 6        | No            | 1       | No           | 1       | No           | 1       | No           | 1       | No           | 1       |
|                                  | 8 to 6         | No            | 1       | No           | 1       | No           | 1       | No           | 1       | No           | 1       |
| <i>A. niger</i>                  | 11 to 4        | Yes           | < 0.001 | Yes          | < 0.001 | Yes          | < 0.001 | Yes          | < 0.001 | Yes          | < 0.001 |
|                                  | 13 to 8        | Yes           | < 0.001 | No           | 0.066   | Yes          | 0.010   | No           | 0.978   | No           | 1       |
|                                  | 13 to 6        | Yes           | < 0.001 | Yes          | < 0.001 | Yes          | < 0.001 | No           | 0.127   | No           | 0.068   |
|                                  | 8 to 6         | No            | 1       | No           | 1       | No           | 1       | No           | 1       | No           | 1       |
| <i>A. parasiticus</i>            | 11 to 4        | Yes           | < 0.001 | Yes          | < 0.001 | Yes          | < 0.001 | No           | 0.089   | Yes          | 0.023   |
|                                  | 13 to 8        | No            | 0.515   | No           | 1       | No           | 1       | No           | 1       | No           | 1       |
|                                  | 13 to 6        | Yes           | < 0.001 | Yes          | 0.020   | No           | 0.091   | No           | 1       | No           | 1       |
|                                  | 8 to 6         | Yes           | < 0.001 | Yes          | 0.002   | Yes          | 0.008   | No           | 1       | No           | 1       |
| <i>Penicillium glabrum</i>       | 11 to 4        | Yes           | < 0.001 | Yes          | < 0.001 | Yes          | < 0.001 | Yes          | 0.004   | Yes          | 0.003   |
|                                  | 13 to 8        | Yes           | 0.002   | Yes          | < 0.001 | Yes          | 0.037   | No           | 1.000   | No           | 0.814   |
|                                  | 13 to 6        | Yes           | < 0.001 | Yes          | < 0.001 | Yes          | < 0.001 | No           | 0.569   | No           | 0.448   |
|                                  | 8 to 6         | No            | 1       | No           | 1       | No           | 1       | No           | 1       | No           | 1       |
| <i>Rhizopus stolonifer</i>       | 11 to 4        | Yes           | < 0.001 | No           | 0.666   | No           | 0.164   | nd           | nd      | nd           | nd      |
|                                  | 13 to 8        | No            | 1       | No           | 1       | No           | 1       | nd           | nd      | nd           | nd      |
|                                  | 13 to 6        | No            | 1       | No           | 1       | No           | 1       | nd           | nd      | nd           | nd      |
|                                  | 8 to 6         | No            | 1       | No           | 1       | Yes          | 0.012   | nd           | nd      | nd           | nd      |

**Figure S1**

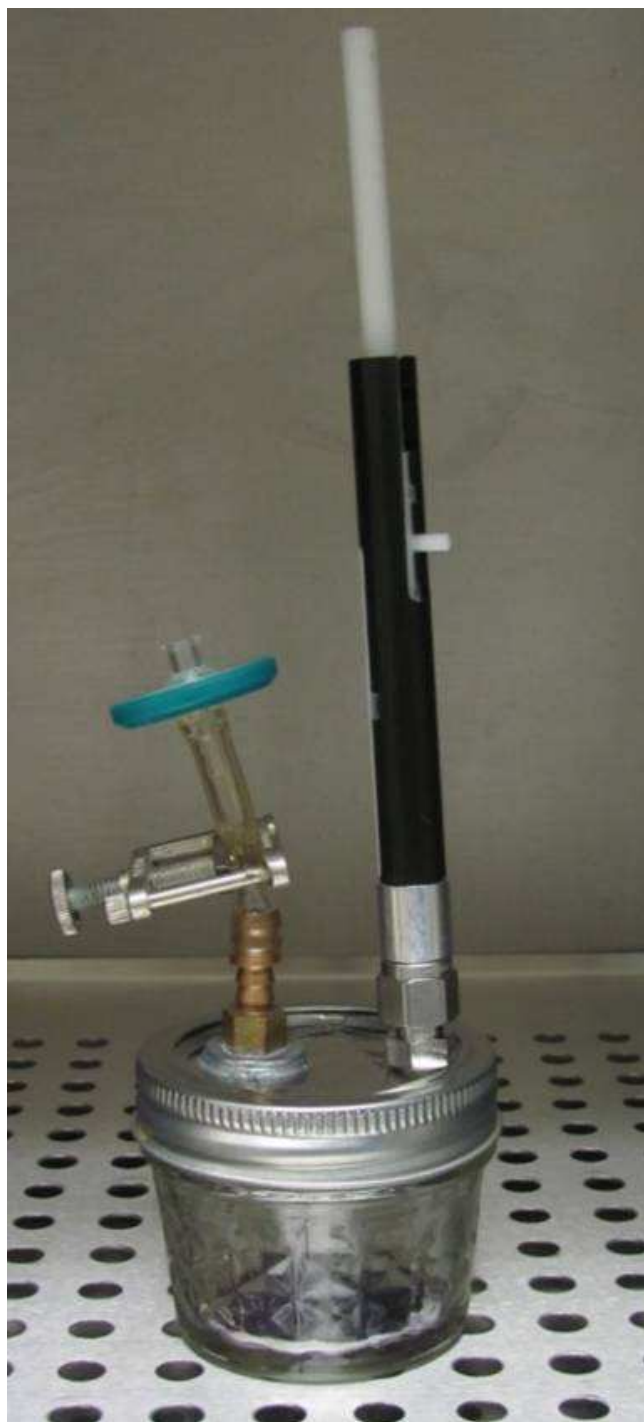

Supplement: Supplementary file 1 [file 4106812]
